# Supplementary material for: Comprehensive Analysis of Circular RNAs in Endothelial Cells
Source: MDPI journal article supplement (doi:10.3390/ijms241210025), 2023-06-12
Supplement: s1 [file s1]

Supplementary materials for article *Comprehensive analysis of circular RNAs in endothelial cells*  
(Licholai, S.; Studzinska, D.; Plutecka H., Gubala T., Sanak, M.).

| <b>circBase ID</b> | <b>CircAtlas2 ID</b> | <b>Host Gene Name</b> |
|--------------------|----------------------|-----------------------|
| hsa_circ_0000284   | hsa-HIPK3_0001       | HIPK3                 |
| NA                 | hsa-ZNF124_0005      | ZNF124                |
| hsa_circ_0002922   | hsa-ZNF124_0001      | ZNF124                |
| hsa_circ_0001445   | hsa-SMARCA5_0005     | SMARCA5               |
| hsa_circ_0001829   | hsa-SLC45A4_0002     | SLC45A4               |
| hsa_circ_0000437   | hsa-CORO1C_0003      | CORO1C                |
| hsa_circ_0001900   | hsa-CAMSAP1_0001     | CAMSAP1               |
| hsa_circ_0006156   | hsa-FNDC3B_0004      | FNDC3B                |
| hsa_circ_0001727   | hsa-ZKSCAN1_0001     | ZKSCAN1               |
| hsa_circ_0001944   | hsa-FIRRE_0001       | FIRRE                 |
| hsa_circ_0001610   | hsa-TNFRSF21_0001    | TNFRSF21              |
| hsa_circ_0001681   | hsa-RAPGEF5_0006     | RAPGEF5               |
| hsa_circ_0000615   | hsa-ZNF609_0001      | ZNF609                |
| hsa_circ_0001451   | hsa-FBXW7_0005       | FBXW7                 |
| hsa_circ_0000523   | hsa-METTL3_0002      | METTL3                |
| hsa_circ_0000471   | hsa-N4BP2L2_0001     | N4BP2L2               |
| NA                 | hsa-RAPGEF5_0001     | RAPGEF5               |
| hsa_circ_0000118   | hsa-MAN1A2_0003      | MAN1A2                |
| hsa_circ_0008285   | hsa-CDYL_0005        | CDYL                  |
| hsa_circ_0001522   | hsa-CSNK1G3_0001     | CSNK1G3               |

Host

*Table S1. 20 most abundant circRNAs in endothelial cells*

| <b>Circular RNA ID</b> | <b>Host Gene Name</b> | <b>Host Gene Description</b>               |
|------------------------|-----------------------|--------------------------------------------|
| hsa_circ_0003910       | SUMF1                 | sulfatase modifying factor 1               |
| hsa-C9orf84_0005       | NA                    | not annotated                              |
| hsa_circ_0001947       | AFF2                  | AF4/FMR2 family member 2                   |
| hsa_circ_0007375       | FBXL13                | F-box and leucine rich repeat protein 13   |
| hsa_circ_0001946       | LINC00632             | long intergenic non-protein coding RNA 632 |
| hsa_circ_0001451       | FBXW7                 | F-box and WD repeat domain containing 7    |
| hsa_circ_0002922       | ZNF124                | zinc finger protein 124                    |
| hsa_circ_0002874       | GLIS3                 | GLIS family zinc finger 3                  |
| hsa_circ_0000233       | CCDC7                 | coiled-coil domain containing 7            |
| hsa-RIMS1_0021         | RIMS1                 | regulating synaptic membrane exocytosis 1  |
| hsa_circ_0003380       | ZFPM2                 | zinc finger protein, FOG family member 2   |
| hsa_circ_0000284       | HIPK3                 | homeodomain interacting protein kinase 3   |
| hsa-XKRX_0001          | XKRX                  | XK related, X-linked                       |
| hsa_circ_0001947       | AFF2                  | AF4/FMR2 family member 2                   |

*Table S2. A list of 14 genes for which the expression level of the linear version of mRNA is lower than that of circular RNA. The Circular RNA ID is given after CircBase, CircAtlas (in that order) of available.*
